# Supplementary material
Source: publisher figshare collection journal article supplement (https://acs.figshare.com/ndownloader/files/16239701)
Supplement: Supplementary file 1 [file 16239701]

# Kinetics Study of the Reactions of 4-Methyl-2-Pentanone and m-Ethyl Toluene with Hydroxyl Radical between 240-340 K and 1-8 Torr Using the Relative Rate/Discharge Flow/Mass Spectrometry Technique

Rachel Kaiser, John Hasenbein, and Zhuangjie Li\*

Department of Chemistry and Biochemistry, California State University Fullerton, Fullerton, CA 92831

## Supporting Information

**Table 1S:** List of relevant chemical reactions used in the chemical model simulation in assessing the contribution of atomic oxygen and hydrogen to the decay of styrene and reference compounds

| Reaction <sup>a</sup>             | $k$ (cm <sup>3</sup> molecule <sup>-1</sup> s <sup>-1</sup> ) | Reference              |
|-----------------------------------|---------------------------------------------------------------|------------------------|
| F + H <sub>2</sub> O → HF + OH    | $1.4 \times 10^{-11}$                                         | 25                     |
| OH + OH → H <sub>2</sub> O + O    | $1.9 \times 10^{-12}$                                         | 25                     |
| OH + wall → product               | 10 <sup>b</sup>                                               | estimate <sup>d</sup>  |
| O + OH → O <sub>2</sub> + H       | $3.3 \times 10^{-11}$                                         | 25                     |
| H + wall → product                | 10 <sup>b</sup>                                               | estimate <sup>d</sup>  |
| H + OH + M → H <sub>2</sub> O + M | $2.3 \times 10^{-31c}$                                        | 33                     |
| O + F <sub>2</sub> → FO + F       | $1.0 \times 10^{-16}$                                         | 34                     |
| FO + OH → O <sub>2</sub> + HF     | $1.3 \times 10^{-12}$                                         | estimate <sup>e</sup>  |
| H + F <sub>2</sub> → HF + F       | $1.38 \times 10^{-12}$                                        | 35                     |
| Target + OH → products            | $1.25 \times 10^{-11}$                                        | this work <sup>f</sup> |
| Reference + OH → products         | $1.09 \times 10^{-11}$                                        | 27 <sup>g</sup>        |
| Target + O → products             | $4.52 \times 10^{-12}$                                        | 36-39 <sup>h</sup>     |
| Reference + O → products          | $3.50 \times 10^{-11}$                                        | 40-41 <sup>h</sup>     |
| Target + H → products             | $6.00 \times 10^{-16}$                                        | 36,38                  |
| Reference + H → products          | $4.37 \times 10^{-15}$                                        | 40-41 <sup>h</sup>     |

<sup>a</sup>Initial concentrations are: [F]<sub>0</sub> =  $1.0 \times 10^{13}$ , [H<sub>2</sub>O]<sub>0</sub> =  $7.1 \times 10^{14}$ , [F<sub>2</sub>]<sub>0</sub> =  $2.0 \times 10^{12}$ , [Target]<sub>0</sub> =  $4.3 \times 10^{13}$ , [Reference]<sub>0</sub> =  $7.9 \times 10^{13}$  molecules cm<sup>-3</sup>, respectively. The initial concentrations of [H]<sub>0</sub> and [O]<sub>0</sub> are zero. <sup>b</sup>Units for the wall loss constant is s<sup>-1</sup>, while the <sup>c</sup>units for the termination reaction of H + OH is cm<sup>6</sup> molecule<sup>-2</sup> s<sup>-1</sup>. <sup>d</sup>Estimate values were used on the basis from the OH wall loss. <sup>e</sup>Estimation was based on  $k(\text{ClO} + \text{OH})$ . <sup>f</sup> $k_{\text{MIBK}+\text{OH}} = 1.25 \times 10^{-11}$  cm<sup>3</sup> molecule<sup>-1</sup> s<sup>-1</sup>,

$k_{MET+OH} = 2.07 \times 10^{-11} \text{ cm}^3 \text{ molecule}^{-1} \text{ s}^{-1}$ .  $^g k_{1,4\text{-dioxane}+OH} = 1.09 \times 10^{-11} \text{ cm}^3 \text{ molecule}^{-1} \text{ s}^{-1}$ ,<sup>27</sup>  
 $k_{nonane+OH} = 1.13 \times 10^{-11} \text{ cm}^3 \text{ molecule}^{-1} \text{ s}^{-1}$ .<sup>28</sup>  $^h k_{MIBK+O} = 4.83 \times 10^{-16} \text{ cm}^3 \text{ molecule}^{-1} \text{ s}^{-1}$ , and  
 $k_{MIBK+H} = 6.00 \times 10^{-16} \text{ cm}^3 \text{ molecule}^{-1} \text{ s}^{-1}$  were estimated from O and H + acetone,<sup>36</sup>  $^h k_{MET+O} =$   
 $3.98 \times 10^{-13} \text{ cm}^3 \text{ molecule}^{-1} \text{ s}^{-1}$  was estimated from O + m-xylene,<sup>37</sup>  $k_{MET+H} = 1.82 \times 10^{-13} \text{ cm}^3$   
 $\text{molecule}^{-1} \text{ s}^{-1}$  was estimated from H + p-xylene,<sup>38</sup>  $k_{1,4\text{-dioxane}+O} = k_{1,4\text{-dioxane}+H} = 6.81 \times 10^{-14} \text{ cm}^3$   
 $\text{molecule}^{-1} \text{ s}^{-1}$  were estimated from O and H + 1,4-dioxane,<sup>39</sup>  $k_{n\text{-pentane}+H} = 4.37 \times 10^{-15} \text{ cm}^3$   
 $\text{molecule}^{-1} \text{ s}^{-1}$  and  $k_{nonane+O} = 1.70 \times 10^{-13} \text{ cm}^3 \text{ molecule}^{-1} \text{ s}^{-1}$  was estimated from H and O +  
octane,<sup>40,41</sup> respectively.
